# Supplementary material for: Does the global activity limitation indicator measure participation restriction? Data from the European Health and Social Integration Survey in Spain
Source: Springer Nature journal article supplement (doi:10.1007/s11136-021-03057-z), 2021-12-09
Supplement: MOESM3 [file 19946198]

**Online Resource 3** Associations of all predictors, simultaneously adjusted, with GALI and SRH

|                      | Aged 18-64 years, N = 10287        |                  | Aged 65+ years, N = 3371           |                  |
|----------------------|------------------------------------|------------------|------------------------------------|------------------|
|                      | Fully adjusted odds ratio (95% CI) |                  | Fully adjusted odds ratio (95% CI) |                  |
| Predictors           | GALI = limited                     | SRH= fair/bad    | GALI = limited                     | SRH= fair/bad    |
| Education & training |                                    |                  |                                    |                  |
| No restrictions      | Ref.                               | Ref.             | Ref.                               | Ref.             |
| Restrictions         | 0.87 (0.35-2.12)                   | 0.63 (0.30-1.35) | 0.45 (0.16-1.24)                   | 1.06 (0.33-3.39) |
| Work                 |                                    |                  |                                    |                  |
| No restrictions      | Ref.                               | Ref.             | Ref.                               | Ref.             |
| Restrictions         | 5.54 (3.79-8.11)                   | 4.98 (3.43-7.25) | 3.31 (1.50-7.29)                   | 3.73 (1.69-8.24) |
| Mobility             |                                    |                  |                                    |                  |
| No restrictions      | Ref.                               | Ref.             | Ref.                               | Ref.             |
| Restrictions         | 4.49 (2.76-7.31)                   | 3.78 (2.43-5.89) | 3.02 (1.94-4.70)                   | 2.64 (1.78-3.92) |
| Community & leisure  |                                    |                  |                                    |                  |
| No restrictions      | Ref.                               | Ref.             | Ref.                               | Ref.             |
| Restrictions         | 3.03 (2.08-4.42)                   | 2.97 (2.04-4.32) | 3.51 (2.45-5.03)                   | 2.96 (2.12-4.14) |
| Domestic life        |                                    |                  |                                    |                  |
| No restrictions      | Ref.                               | Ref.             | Ref.                               | Ref.             |
| Restrictions         | 4.49 (3.13-6.46)                   | 2.64 (1.86-3.73) | 3.39 (2.53-4.54)                   | 2.04 (1.52-2.73) |
| Self-care            |                                    |                  |                                    |                  |
| No restrictions      | Ref.                               | Ref.             | Ref.                               | Ref.             |
| Restrictions         | 3.67 (2.30-5.88)                   | 2.62 (1.61-4.26) | 3.54 (2.58-4.84)                   | 2.25 (1.67-3.03) |
| Age                  |                                    |                  |                                    |                  |
| 18-34                | Ref.                               | Ref.             | -                                  | -                |
| 35-44                | 1.17 (0.92-1.36)                   | 2.18 (1.69-2.80) | -                                  | -                |
| 45-54                | 1.36 (1.12-1.66)                   | 3.34 (2.64-4.23) | -                                  | -                |
| 55-64                | 1.55 (1.25-1.91)                   | 4.64 (3.63-5.92) | -                                  | -                |
| 65-74                | -                                  | -                | Ref.                               | Ref.             |
| 75+                  | -                                  | -                | 1.18 (0.95-1.48)                   | 0.96 (0.78-1.18) |
| Gender               |                                    |                  |                                    |                  |
| Male                 | Ref.                               | Ref.             | Ref.                               | Ref.             |
| Female               | 1.21 (1.05-1.39)                   | 1.39 (1.20-1.60) | 1.30 (1.05-1.61)                   | 1.13 (0.93-1.38) |
| Educ. attainment     |                                    |                  |                                    |                  |
| University           | Ref.                               | Ref.             | Ref.                               | Ref.             |
| Higher secondary     | 1.27 (1.05-1.53)                   | 1.89 (1.53-2.35) | 0.91 (0.59-1.41)                   | 1.16 (0.74-1.83) |
| Comp. secondary      | 1.15 (0.97-1.38)                   | 2.65 (2.19-3.20) | 0.85 (0.61-1.18)                   | 1.90 (1.33-2.70) |
| Primary              | 1.54 (1.19-1.99)                   | 4.20 (5.27-5.40) | 0.85 (0.60-1.18)                   | 3.13 (2.20-4.45) |

**Article title:** Does the Global Activity Limitation Indicator measure participation restriction?

Data from the European Health and Social Integration Survey in Spain.

**Journal name:** Quality of Life Research.

**Author names:** Julio Cabrero-García<sup>a</sup>, Juan Ramón Rico-Juan<sup>b</sup>, Antonio Oliver-Roig<sup>c</sup>.

**Affiliation:** <sup>a, c</sup>Department of Nursing, University of Alicante. <sup>b</sup>Department of Software and Computing Systems, University of Alicante.

**Corresponding author:** Julio Cabrero-García. E-mail: [julio.cabrero@ua.es](mailto:julio.cabrero@ua.es)
